# Supplementary material
Source: PubMed Central journal article supplement (PMC3799561)
Supplement: supp_13-11943_IOVS-13-11943-s01.pdf [file supp_13-11943_IOVS-13-11943-s01.pdf]

Table 1: Primers used for amplifying genes.

| <b>Gene</b>      | <b>Forward primer</b>    | <b>Reverse primer</b>    |
|------------------|--------------------------|--------------------------|
| <i>OCT4</i>      | CAATTTGCCAAGCTCCTGA      | CGTTTGGCTGAATACCTTCC     |
| <i>NANOG</i>     | ATGCCTCACACGGAGACTGT     | AGGGCTGTCCTGAATAAGCA     |
| <i>SOX2</i>      | ATGGGTTCCGGTGGTCAAGT     | GGAGGAAGAGGTAACCCACAGG   |
| <i>KLF4</i>      | TCTCAAGGCACACCTGCGAA     | TAGTGCCTGGTCAGTTCATC     |
| <i>VSX2</i>      | ACCAGACCAAGAAACGGAAGAAGC | TCTGGGTAGTGGGCTTCGTTGAAT |
| <i>GFAP</i>      | AGCCTGGACACCAAGTCTGT     | CGGAGCAACTATCCTGCTTC     |
| <i>RECOVERIN</i> | CTCCTTCCAGACGATGAAAACA   | GCCAGTGTCCCCTCAATGAA     |
| <i>BRN3B</i>     | AGCGCTCTCACTTACCCTTACACA | AAATGGTGCATCGGTCATGCTTCC |
| <i>BEST1</i>     | ATTTATAGGCTGGCCCTCACGGAA | TGTTCTGCCGGAGTCATAAAGCCT |
| <i>MERTK</i>     | AGCCTGAGAGCATGAATGTCACCA | TGTTGATCTGCACTCCCTTGGACA |
| <i>MITF</i>      | TTCACGAGCGTCCTGTATGCAGAT | TTGCAAAGCAGGATCCATCAAGCC |
| <i>PEDF</i>      | AGATCTCAGCTGCAAGATTGCCCA | ATGAATGAACTCGGAGGTGAGGCT |
| <i>RPE65</i>     | GCCCTCCTGCACAAGTTTGACTTT | AGTTGGTCTCTGTGCAAGCGTAGT |
| <i>OCCLUDIN</i>  | TCCTATAAATCCACGCCGGTTCCT | AGGTGTCTCAAAGTTACCACCGCT |
| <i>CRALBP</i>    | TTCCGCATGGTACCTGAAGAGGAA | ACTGCAGCCGGAAATTCACATAGC |
| <i>FNI</i>       | AATATCTCGGTGCCATTTGC     | AAAGGCATGAAGCACTCAAT     |
| <i>ACTA2</i>     | TGACTGAGCGTGGCTATTCC     | GCCCATCAGGCAACTCGTAA     |
| <i>KRT18</i>     | GGCATCCAGAACGAGAAGGA     | AGTGCTCCCGGATTTTGCT      |

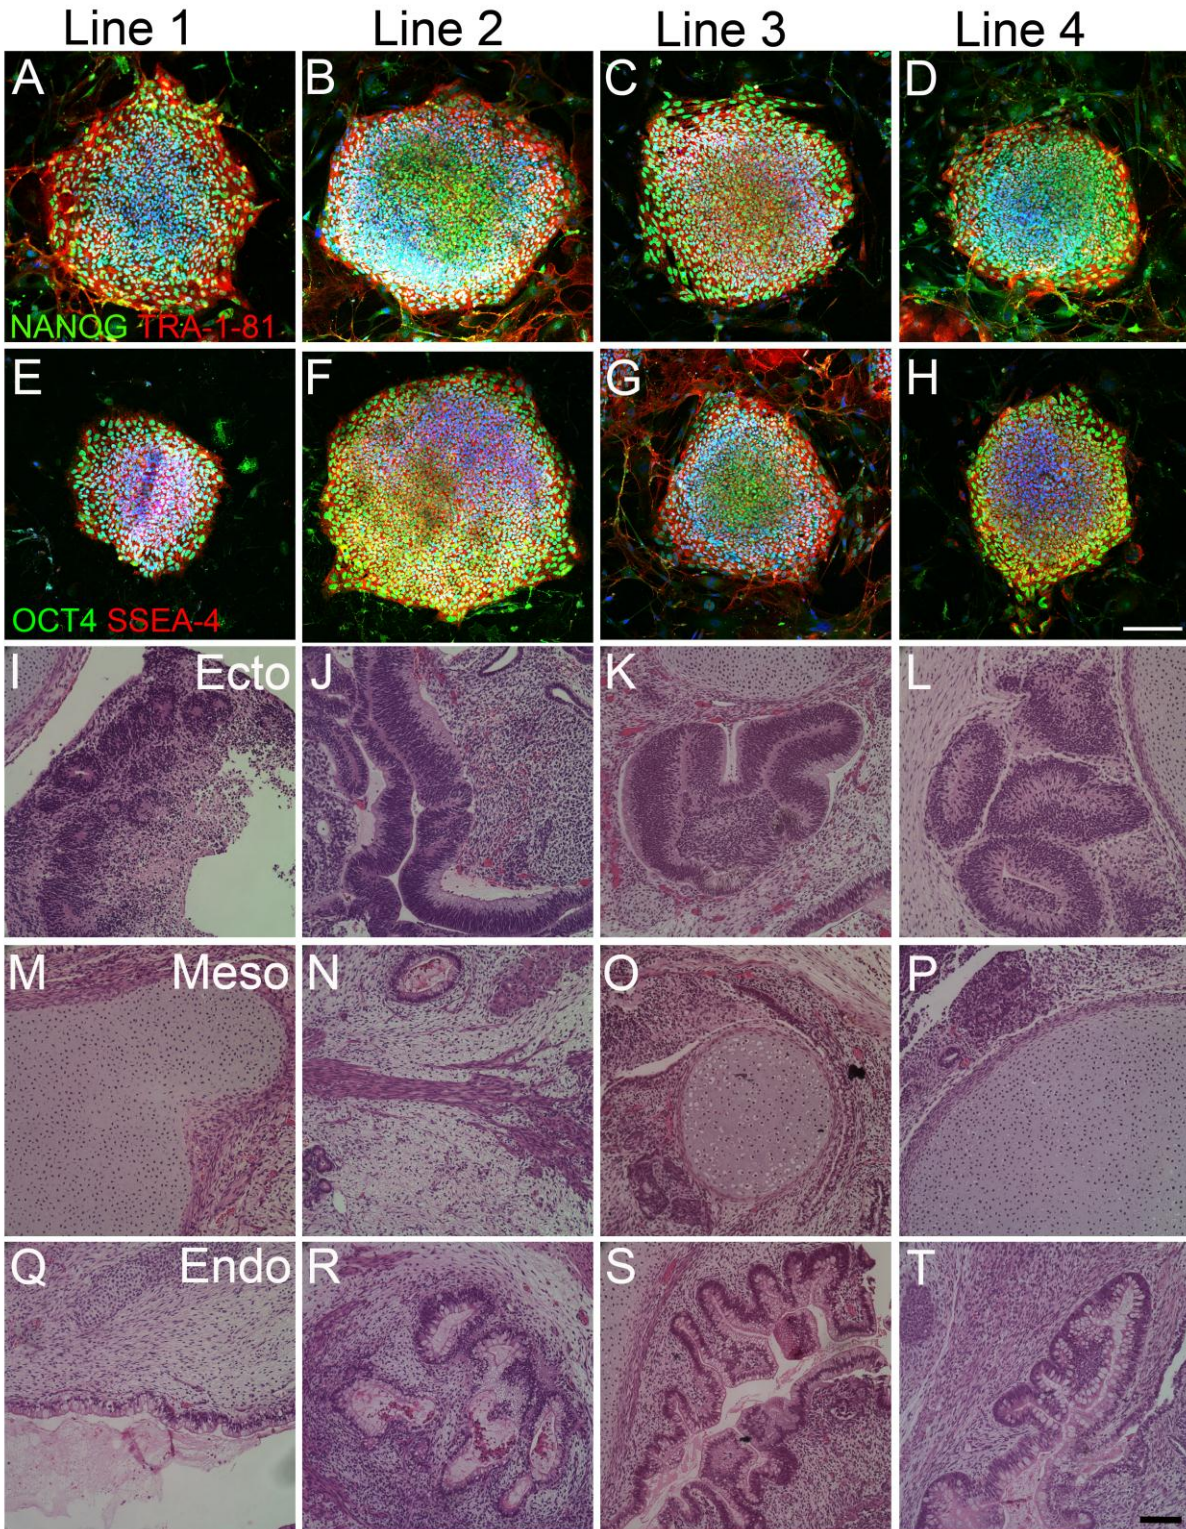

**Figure S1. Characterization of hiPSCs derived from four different individuals. (A-H)** Immunocytochemistry analysis demonstrating the expression of pluripotency markers in all four undifferentiated hiPSC lines. **(I-T)** Teratoma analyses of hiPSC lines showing the presence of endodermal, ectodermal, and mesodermal germ lineage derivatives. Scale bar = 100  $\mu$ m.



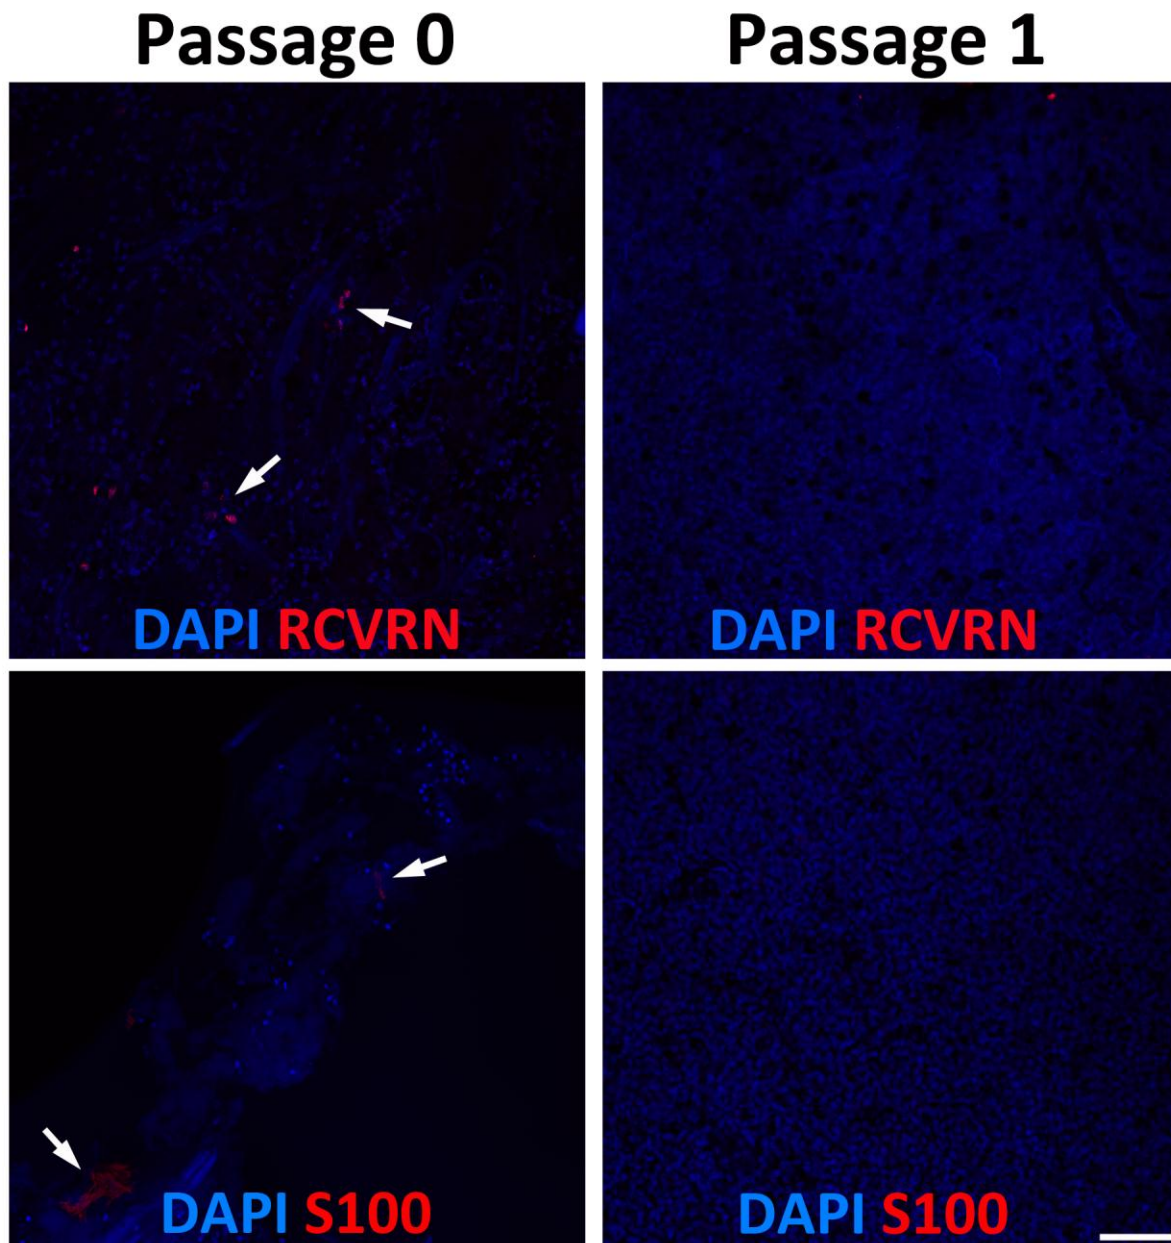

**Figure S2. Expression of neuroretinal markers in passaged hiPSC-RPE.** Representative confocal images showing rare expression of neuroretinal proteins (RCVRN, S100) in P0, but not P1, hiPSC-RPE. Cells from both passages were acutely dissociated, fixed, and immunostained for 24 hours prior to imaging with confocal microscopy. Scale bar = 50  $\mu$ m.
